# Supplementary material
Source: PubMed Central journal article supplement (PMC6047899)
Supplement: NIHMS968484-supplement-Supplemental_Information.pdf [file NIHMS968484-supplement-Supplemental_Information.pdf]

**Cell, Volume 171**

**Supplemental Information**

**Single-Cell Analysis of Human Pancreas**

**Reveals Transcriptional Signatures**

**of Aging and Somatic Mutation Patterns**

**Martin Enge, H. Efsun Arda, Marco Mignardi, John Beausang, Rita Bottino, Seung K. Kim, and Stephen R. Quake**

**Supplementary Data Table 1 – Summary of donors  
(Related to Figure 1)**

| <b>Donor</b> | <b>Age</b>     | <b>Sex</b> | <b>Race</b>          | <b>Cause of death</b> | <b>BMI</b> |
|--------------|----------------|------------|----------------------|-----------------------|------------|
|              | 1 month<br>old |            | African<br>American  |                       |            |
| DID_scRSq01  |                | Male       | American             | Anoxia                | 13.71      |
| DID_scRSq02  | 5              | Male       | Caucasian            | Auto accident         | 17.6       |
| DID_scRSq03  | 6              | Male       | not provided         | Head trauma           | (29 kg)    |
| DID_scRSq04  | 21             | Male       | Caucasian            | Anoxia                | 28.4       |
| DID_scRSq05  | 22             | Male       | Asian                | Head trauma           | 24.8       |
| DID_scRSq06  | 38             | Female     | Caucasian<br>African | Stroke                | 29.5       |
| DID_scRSq07  | 44             | Female     | American             | Stroke                | 23.8       |
| DID_scRSq08  | 54             | Male       | Caucasian            | Anoxia                | 27.29      |

**Supplementary Data Table 2 – Summary of gene expression effects  
(Related to Figure 1)**

| Association                  | Number of genes with FDR<1E-3 |
|------------------------------|-------------------------------|
| <i>Organismal Age</i>        | 5                             |
| <i>Transcriptional Noise</i> | 2261                          |
| <i>Signature S1</i>          | 1595                          |
| <i>Signature S2</i>          | 45                            |
| <i>Signature S3</i>          | 4                             |

**Supplementary Data Table 8 – Detection probes for *in situ* RNA staining  
(Related to STAR Methods)**

| PROBE NAME                           | SOURCE     | IDENTIFIER |
|--------------------------------------|------------|------------|
| DO_1_FITC: AGUCGGAAGUACTACTCUCT_FITC | This paper | N/A        |
| DO_1_Cy3: CCUCAATGCUGCTGCTGUAC_Cy3   | This paper | N/A        |
| DO_1_Cy5: TGUGTCTATUTAGTGGAUCC_Cy5   | This paper | N/A        |
| DO_2_FITC: CGUGCGCCUGGTAGCAAUTA_FITC | This paper | N/A        |
| DO_2_Cy3: AGUAGCCGUGACTATCGUCT_Cy3   | This paper | N/A        |
| DO_2_Cy5: TCUACGATUTTACCAGTUGC_Cy5   | This paper | N/A        |
| DO_3_FITC: CCUAGATGTUCCGCTATUGT_FITC | This paper | N/A        |
| DO_3_Cy3: GCUCCACTGUTACTAGAUTG_Cy3   | This paper | N/A        |
| DO_3_Cy5: CTUGTGCTGUATGATCGUCC_Cy5   | This paper | N/A        |
